# Supplementary material for: Mo-Doped ultrafine VC nanoparticles confined in few-layer graphitic nanocarbon for improved electrocatalytic hydrogen evolution
Source: Royal Society of Chemistry journal article supplement (doi:10.1039/c9qi01679a), 2020-01-01
Supplement: c9qi01679a1.pdf [file c9qi01679a1.pdf]

Supporting Information(SI):

**Mo-doped ultrafine VC nanoparticles confined in few-layer  
graphitic nanocarbon for improved electrocatalytic hydrogen  
evolution**

Liyun Cao <sup>a</sup>, Ning Zhang <sup>a</sup>, Liangliang Feng <sup>\*a,b</sup>, Danyang He <sup>a</sup>, Koji Kajiyoshi <sup>b</sup>,

Xiaoyi Li <sup>a</sup>, Qian Huang <sup>a</sup>, Li Feng <sup>a</sup>, Jianfeng Huang <sup>a</sup> and Ruizi Li <sup>\*a</sup>

<sup>a</sup> *School of Materials Science & Engineering, International S&T Cooperation Foundation of Shaanxi Province, Xi'an Key Laboratory of Green Manufacture of Ceramic Materials, Shaanxi Key Laboratory of Green Preparation and Functionalization for Inorganic Materials, Shaanxi University of Science & Technology, Xi'an Shaanxi 710021, P.R. China.*

<sup>b</sup> *Research Laboratory of Hydrothermal Chemistry, Faculty of Science and Technology, Kochi University, Kochi, 780-8520, Japan.*

E-mail: fengll@sust.edu.cn; liruizi\_sust@163.com

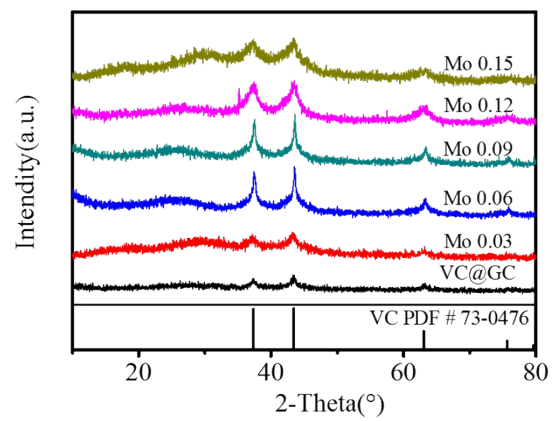

**Fig. S1** XRD patterns of samples with different Mo-doping amount.

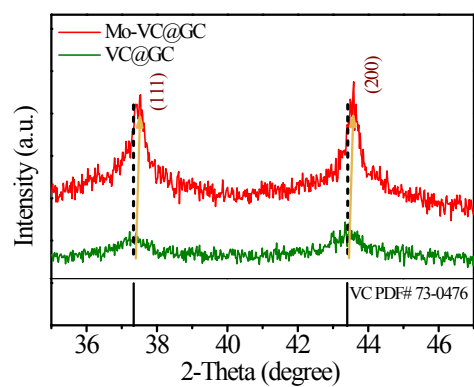

**Fig. S2** XRD patterns with zoomed-in image of VC@GC and Mo-VC@GC.

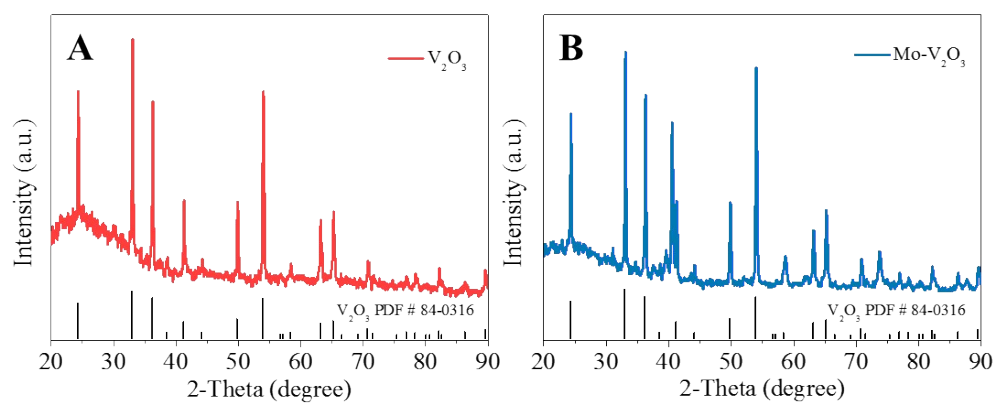

**Fig. S3** XRD patterns of (A)  $V_2O_3$  and (B)  $Mo-V_2O_3$ .

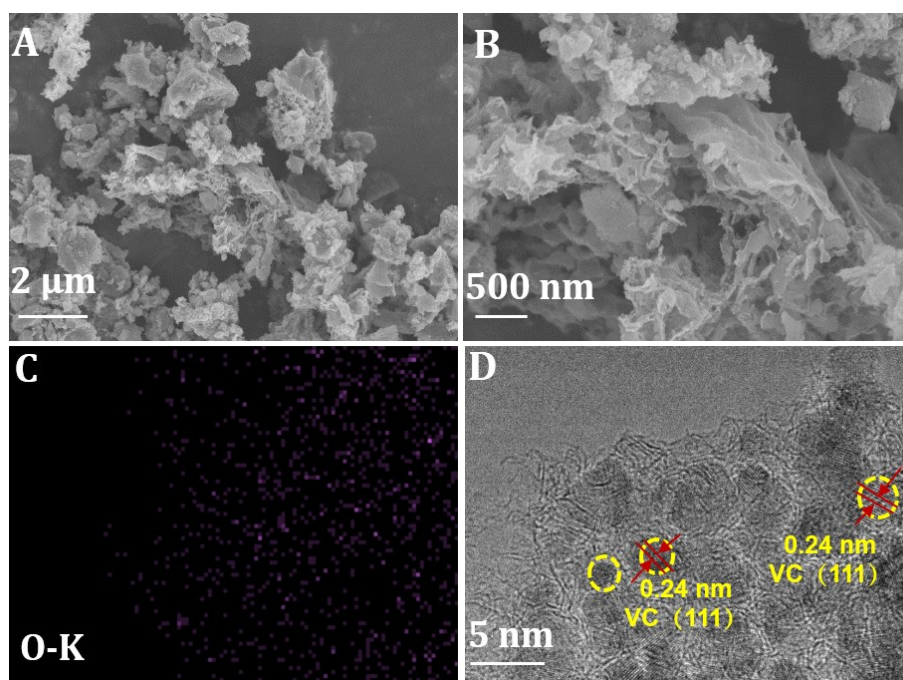

**Fig. S4** (A-B) SEM images, (C) the O elemental mapping image, (D) the high-resolution TEM image of Mo-VC@GC.

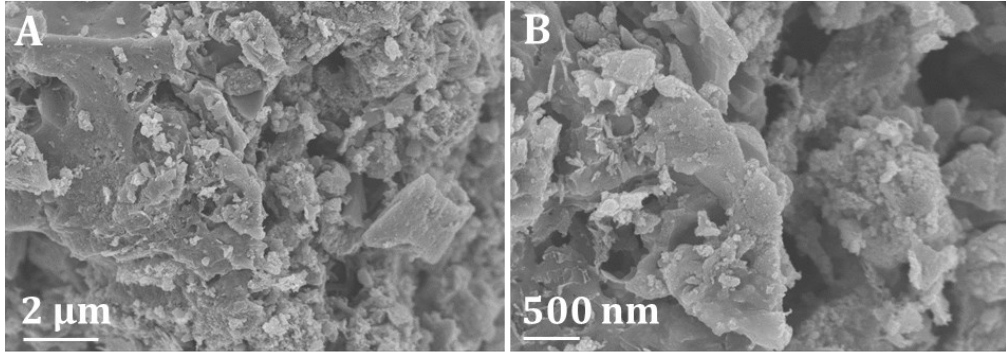

**Fig. S5** (A-B) SEM images of VC@GC.

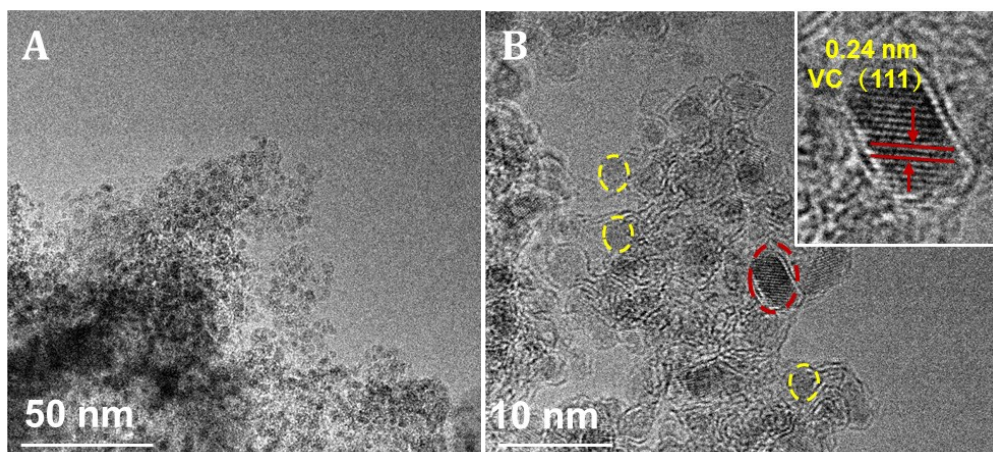

**Fig. S6** (A-B) TEM and high-resolution TEM images of VC@GC.

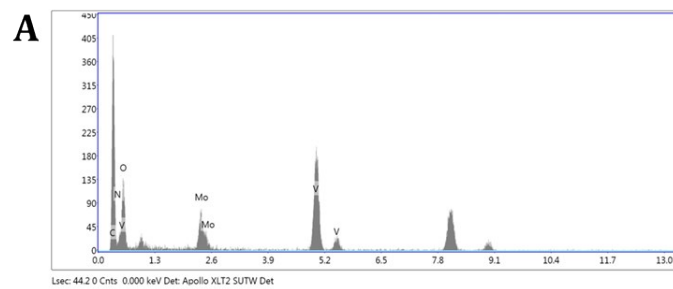

**B**

| Element | Weight % | Atomic % | Net Int. | Error % | Kratio |
|---------|----------|----------|----------|---------|--------|
| C K     | 13.90    | 16.53    | 37.3     | 6.90    | 0.09   |
| N K     | 53.39    | 54.46    | 86.1     | 8.62    | 0.18   |
| O K     | 32.39    | 28.92    | 43.7     | 12.06   | 0.04   |
| V K     | 0.27     | 0.07     | 113.5    | 16.45   | 0.01   |
| MoK     | 0.05     | 0.01     | 11.5     | 22.17   | 0.00   |

**Fig. S7** EDX results of Mo-VC@GC.



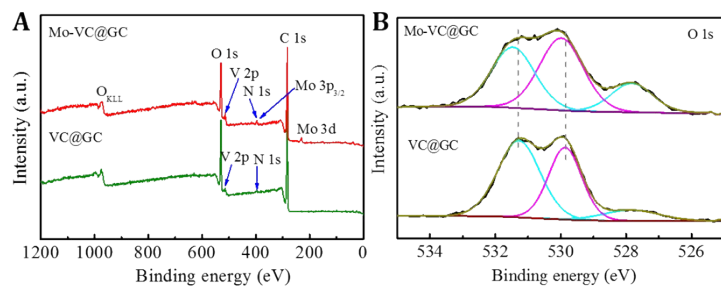

**Fig. S8** (A) Survey, (B) O 1s XPS spectra of VC@GC and Mo-VC@GC.

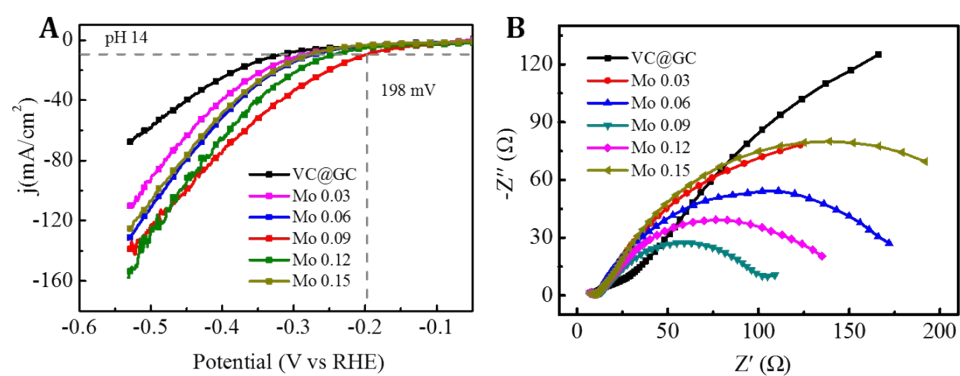

**Fig. S9** (A) Polarization curves, (B) Nyquist plots obtained at the overpotential  $\eta=233\text{mV}$  of samples with different Mo-doping amount at pH 14.

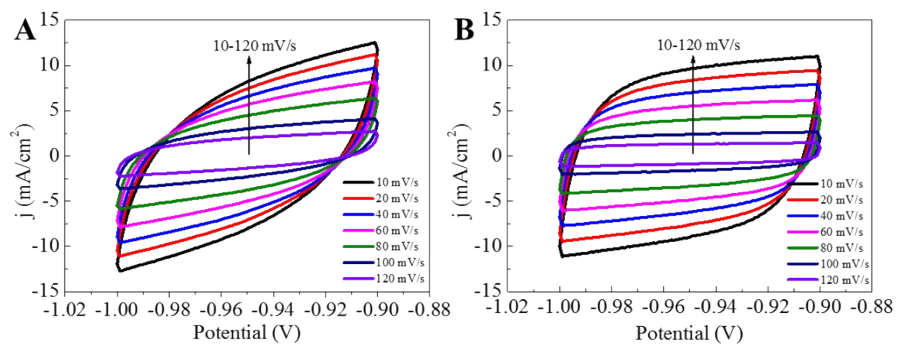

**Fig. S10** CV curves of (A) VC@GC and (B) Mo-VC@GC at different scan rates.

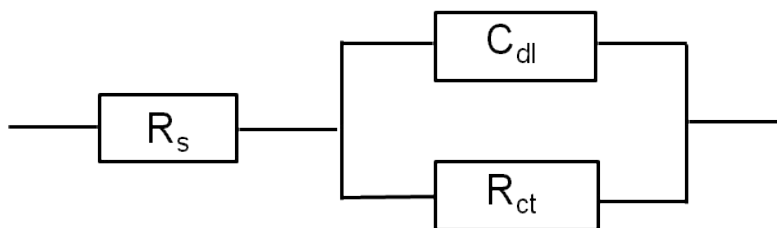

**Fig. S11** Electrical equivalent circuit used to simulate the Nyquist plots in Fig. 5C, where  $R_s$  is the electrolyte resistance,  $R_{ct}$  is the charge-transfer resistance, and  $C_{dl}$  represents the double-layer capacitance.

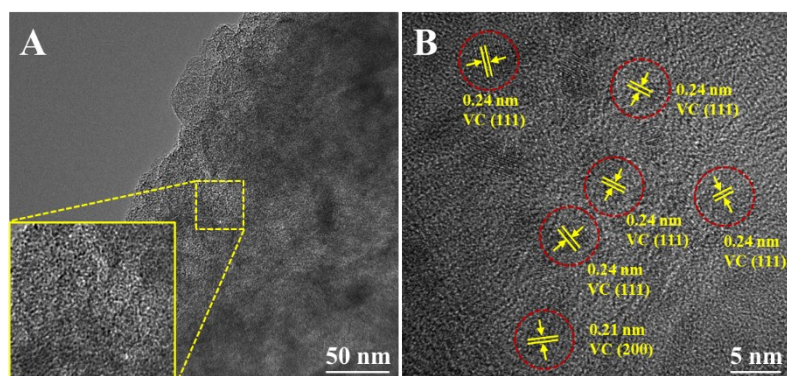

**Fig. S12** (A) TEM and (B) HRTEM images of Mo-VC@GC after the stability test of i-t curve for 80h at pH 14.

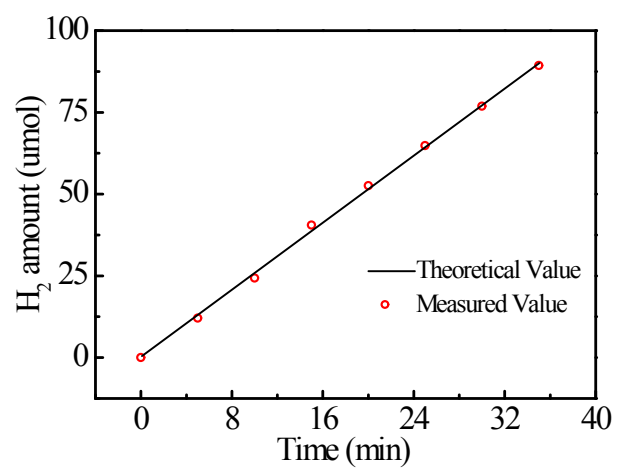

**Fig. S13** Hydrogen production efficiency over Mo-VC@GC at a current density of 8.27 mA/cm<sup>2</sup>, measured for 35 min.

Table S1. The mass percent of Mo and V in the Mo-VC@GC.

| Elements | the mass percentage (%) |
|----------|-------------------------|
| Mo       | 8.66                    |
| V        | 21.65                   |

Table S2. Comparison of HER performance of reported TMCs electrocatalysts.

| Catalyst                     | Electrolyte                          | $\eta_{10}$ (mV) | Stability test | Reference                                                        |
|------------------------------|--------------------------------------|------------------|----------------|------------------------------------------------------------------|
| Mo-VC@GC                     | 1 M KOH                              | 198              | 80 h           | This work                                                        |
| VC@NCNT                      | 1 M KOH                              | 159              | 100 h          | <i>Nanoscale</i> <b>2018</b> , 10, 14272-14279                   |
|                              | 0.5 M H <sub>2</sub> SO <sub>4</sub> | 161              |                |                                                                  |
| Ni-VC-@C/Ti                  | 1 M KOH                              | 146              | 20 h           | <i>J. Mater. Chem. A</i> <b>2017</b> , 5, 23028-23034            |
|                              | 0.5 M H <sub>2</sub> SO <sub>4</sub> | 138              |                |                                                                  |
| VC-NS                        | 0.5 M H <sub>2</sub> SO <sub>4</sub> | 98               | 10000 cycles   | <i>Nano energy</i> <b>2016</b> , 26, 603-609                     |
| Mo <sub>2</sub> C/VC         | 0.5 M H <sub>2</sub> SO <sub>4</sub> | 122              | 10000 cycles   | <i>Nano Energy</i> <b>2019</b> , 60, 520-526                     |
| Mo <sub>2</sub> C@GC         | 0.5 M H <sub>2</sub> SO <sub>4</sub> | 125              | 10000 s        | <i>ACS Appl. Mater. Interfaces</i> <b>2018</b> , 10, 18761-18770 |
| W <sub>2</sub> C@WC          | 0.5 M H <sub>2</sub> SO <sub>4</sub> | 310              | 1000 cycles    | <i>Appl. Catal. B</i> <b>2018</b> , 236, 147-153                 |
| W <sub>2</sub> C@CNT-S       | 1 M KOH                              | 148              | 30 h           | <i>Nanoscale</i> <b>2019</b> , 11, 4876-4884                     |
|                              | 0.5 M H <sub>2</sub> SO <sub>4</sub> | 176              |                |                                                                  |
| W <sub>2</sub> C IO          | 0.5 M H <sub>2</sub> SO <sub>4</sub> | 146              | 10 h           | <i>Nanoscale</i> <b>2019</b> , 11, 11505-11512                   |
| WC/W <sub>2</sub> C@C<br>NWs | 1 M KOH                              | 56               | 2000 cycles    | <i>J. Mater. Chem. A</i> <b>2018</b> , 6, 15395-15403            |
|                              | 0.5 M H <sub>2</sub> SO <sub>4</sub> | 69               |                |                                                                  |
